# Supplementary material for: Phosphate transporters in marine phytoplankton and their viruses: cross-domain commonalities in viral-host gene exchanges
Source: PubMed Central journal article supplement (PMC3429862; doi:10.1111/j.1462-2920.2011.02576.x), 2012-01
Supplement: emi0014-0162-SD1.pdf [file emi0014-0162-SD1.pdf]

1 **Supplementary Tables**

2 **Table S1.** BLASTn results of cluster representatives from the population sort 16S rDNA  
 3 clone library. The sequences appear to be distantly related to those in both NCBI  
 4 environmental nucleotide (env\_nt) and reference genomic sequence (ref\_genomes)  
 5 databases and most related to uncultured bacteria from the nucleotide non-redundant  
 6 database (nt). Note clone library sequence assemblies were not manually curated.

| 16S clust <sup>a</sup>                   | best<br>BLASTn<br>HSP <sup>b</sup> | nt                                             | env_nt               | ref-genomes                   |
|------------------------------------------|------------------------------------|------------------------------------------------|----------------------|-------------------------------|
| #6                                       | Accession                          | HQ672230                                       | AACY023936572        | NC_006832                     |
|                                          | Descrip.                           | Uncultured bacterium clone<br>F9P2610_S_P18    | Marine metagenome    | <i>Ehrlichia ruminantium</i>  |
|                                          | Score                              | 1070                                           | 366                  | 459                           |
|                                          | % ID                               | 94% (663/704)                                  | 77% (562/731)        | 79% (576/728)                 |
| #19 (#21,<br>#2)                         | Accession                          | HQ672230                                       | AACY023245853        | NC_010793.1                   |
|                                          | Descrip.                           | Uncultured bacterium clone<br>F9P2610_S_P18    | Marine metagenome    | <i>Orientia tsutsugamushi</i> |
|                                          | Score                              | 2010                                           | 593                  | 584                           |
|                                          | % ID                               | 93% (1278/1370)                                | 77% (924/1205)       | 77% (930/1213)                |
| #14<br>(#10)                             | Accession                          | HQ672230                                       | AACY023245853        | NC_010793                     |
|                                          | Descrip.                           | Uncultured<br>bacterium clone<br>F9P2610_S_P18 | Marine<br>metagenome | <i>Orientia tsutsugamushi</i> |
|                                          | Score                              | 2032                                           | 562                  | 580                           |
|                                          | % ID                               | 94% (1282/1370)                                | 76% (920/1207)       | 77% (929/1213)                |
| #5                                       | Accession                          | HQ672230                                       | AACY020472379        | NC_007685                     |
|                                          | Descrip.                           | Uncultured bacterium clone<br>F9P2610_S_P18    | Marine metagenome    | <i>Dictyota dichotoma</i>     |
|                                          | Score                              | 1522                                           | 448                  | 460                           |
|                                          | % ID                               | 93% (982/1058)                                 | 76% (741/973)        | 77% (739/963)                 |
| #11<br>(#15, #3,<br>#17, #1,<br>#13, #7) | Accession                          | HQ672230                                       | AACY023245853        | NC_010793                     |
|                                          | Descrip.                           | Uncultured bacterium clone<br>F9P2610_S_P18    | Marine metagenome    | <i>Orientia tsutsugamushi</i> |
|                                          | Score                              | 2100                                           | 606                  | 584                           |
|                                          | % ID                               | 93% (1347/1448)                                | 77% (929/1208)       | 77% (925/1207)                |
| #9                                       | Accession                          | HQ672230                                       | AACY020472379        | NC_010793                     |
|                                          | Descrip.                           | Uncultured bacterium clone<br>F9P2610_S_P18    | Marine metagenome    | <i>Orientia tsutsugamushi</i> |
|                                          | Score                              | 1511                                           | 442                  | 442                           |
|                                          | % ID                               | 93% (979/1055)                                 | 76% (733/962)        | 76% (733/962)                 |
| #18                                      | Accession                          | HQ674331                                       | AACY022560084        | NC_008346.1                   |
|                                          | Descrip.                           | Uncultured bacterium clone<br>F9P262000_S_B04  | Marine metagenome    | <i>Syntrophomonas wolfei</i>  |
|                                          | Score                              | 1941                                           | 1147                 | 1026                          |
|                                          | % ID                               | 92% (1302/1421)                                | 91% (785/862)        | 82% (1034/1255)               |
| #22                                      | Accession                          | HQ674331                                       | AACY022560084        | NC_008346                     |
|                                          | Descrip.                           | Uncultured bacterium clone<br>F9P262000_S_B04  | Marine metagenome    | <i>Syntrophomonas wolfei</i>  |
|                                          | Score                              | 1949                                           | 1158                 | 1026                          |
|                                          | % ID                               | 93% (1264/1364)                                | 91% (786/861)        | 82% (1034/1255)               |

7  
8  
9  
10  
11  
12

a: representative of the cluster of unique sequences (after end-trimming) are noted in bold.  
b: details of best BLASTn hit. Acc: subject database accession number; Des: description of the subject sequence; S: high-scoring segment pair (HSP) BLAST score; % ID: HSP percent identity to the query sequence.

13 **Table S2a.** Number of metagenome sequences and number of identified PHO4  
 14 sequences. Those under Total Pho4 were placed on the PHO4 tree (after retrieval using  
 15 the HMM), but do not necessarily have statistical support for their respective placements.  
 16 The under Euk/Virus could result from hosts or their respective viruses, while those in  
 17 the viral column were unambiguously assigned to viruses. For both these categories only  
 18 sequences retaining placement support (with probability  $\geq 0.75$ ) are included. Total non-  
 19 redundant ORFs are based on 6-frame translation and minimum length of 40 and 60  
 20 amino acids for 454-FLX and Sanger, respectively. Breakdown of read numbers is given  
 21 for all sequencing technologies in Table S4.

|                | Sample Site   | Total Reads | Total ORFs | Total Pho4 | Euk/Virus | Virus |
|----------------|---------------|-------------|------------|------------|-----------|-------|
| <b>454-FLX</b> |               |             |            |            |           |       |
|                | H3 (5 m)      | 1,271,642   | 2,958,995  | 22         | 7         | 1     |
|                | 67-70 (10 m)  | 1,348,486   | 3,070,644  | 13         | 7         | 1     |
|                | 67-155 (5 m)  | 951,998     | 2,146,377  | 12         | 5         | 1     |
|                | 67-155 (86 m) | 1,339,330   | 3,355,005  | 27         | 8         | 0     |
| <b>Sanger</b>  |               |             |            |            |           |       |
|                | H3 (5 m)      | 33,731      | 185,977    | 5          | 1         | 0     |
|                | 67-70 (10 m)  | 215,973     | 388,870    | 12         | 1         | 0     |
|                | 67-155 (5 m)  | -           | -          | -          | -         | -     |
|                | 67-155 (86 m) | 166,361     | 1,010,666  | 4          | 0         | 0     |

22

23 **Table S2b.** Summary of PHO4 detected in the Global Ocean Sampling predicted protein  
 24 datasets as deposited in CAMERA. All PHO4 were identified using the HMM and those  
 25 in the columns Euk/Virus or Virus also had supported positions in the phylogenetic  
 26 analysis (with probability  $\geq 0.75$ ). Sequences in Euk/Virus could result from hosts or  
 27 their respective viruses, while those in the viral column were unambiguously assigned to  
 28 viruses. Total reads does not reflected the number of predicted proteins and the number  
 29 was not easily retrievable.

| <b>Ocean</b>    | <b>Total Reads</b> | <b>Total PHO4</b> | <b>Euk/Virus</b> | <b>Virus</b> | <b># Stations</b> |
|-----------------|--------------------|-------------------|------------------|--------------|-------------------|
| <b>Atlantic</b> | 5,249,354          | 1,176             | 125              | 34           | 21                |
| <b>Pacific</b>  | 3,591,840          | 1,061             | 64               | 1            | 31                |
| <b>Indian</b>   | 2,253,607          | 513               | 69               | 0            | 22                |

30

31 **Table S3.** Summary of PHO4 detected in the Monterey Bay line-67 sequence datasets  
 32 for Sanger and 454-FLX sequencing technologies.

| Sample Site         | Size | Sanger Reads | Sanger ORFs | 454 Reads | 454 ORFs  |
|---------------------|------|--------------|-------------|-----------|-----------|
| <b>H3 (5m)</b>      | S    | 11,330       | 62,565      | 507,338   | 993,036   |
|                     | M    | 11,410       | 62,867      | 429,346   | 1,005,467 |
|                     | L    | 10,991       | 60,545      | 334,958   | 960,433   |
| <b>67-70 (10m)</b>  | S    | 15,746       | 50,341      | 412,051   | 726,048   |
|                     | M    | 100,238      | 642,775     | 499,086   | 1,446,345 |
|                     | L    | 99,989       | 695,754     | 437,349   | 898,201   |
| <b>67-155 (5m)</b>  | S    | -            | -           | 387,007   | 703,403   |
|                     | M    | -            | -           | 262,474   | 739,326   |
|                     | L    | -            | -           | 302,517   | 703,650   |
| <b>67-155 (86m)</b> | S    | 9,231        | 50,932      | 576,404   | 1,195,629 |
|                     | M    | 103,490      | 663,630     | 284,359   | 789,542   |
|                     | L    | 53,640       | 296,104     | 478,567   | 1,369,793 |

33 S=0.1µm to ≤0.8 µm; M= 0.8µm to ≤3µm; L= 3µm to ≤20µm

34

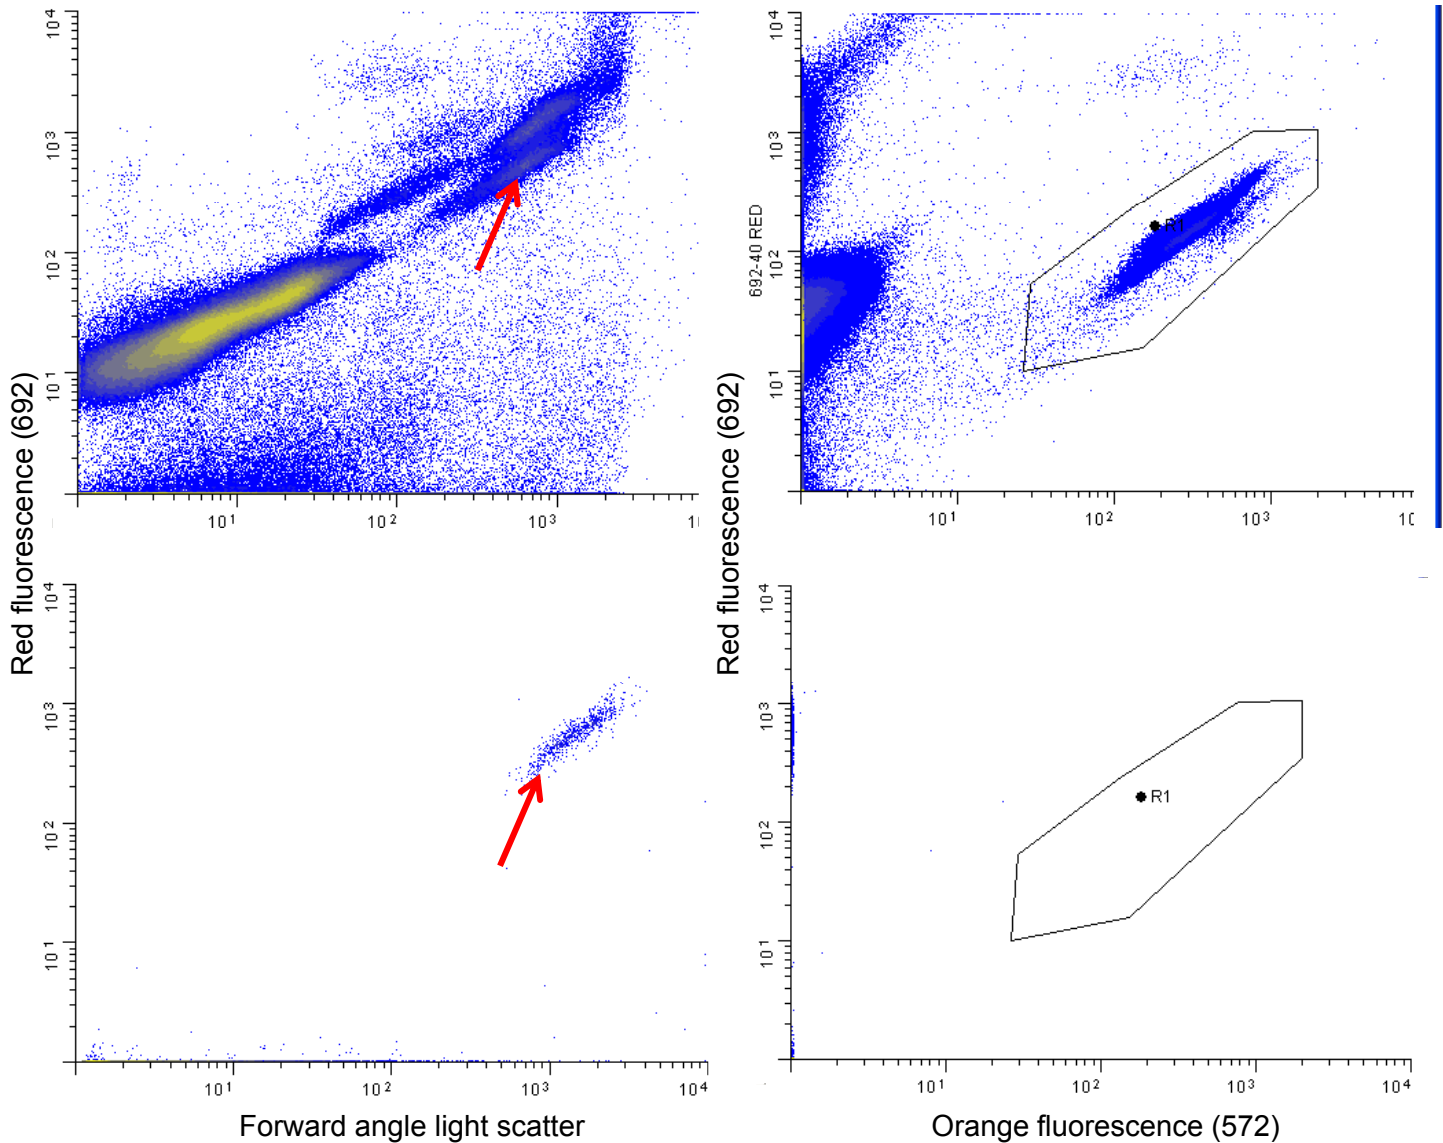

Fig. S1. Flow cytometry histograms of the pre-concentrated tropical Atlantic sample that was sorted. The arrow indicates the target populations. Top panels are the sample as it appeared at sea during sorting. The right hand panel shows *Synechococcus* cells (R1) which have been gated out from the left hand panel. The bottom panel shows the sorted population as thawed and rerun on land where it was resorted for purity. R1 again shows the position where *Synechococcus* would be expected. Note cytometer set up is never identical between runs (even if strived for) hence position of populations in top and bottom panels is slightly different.

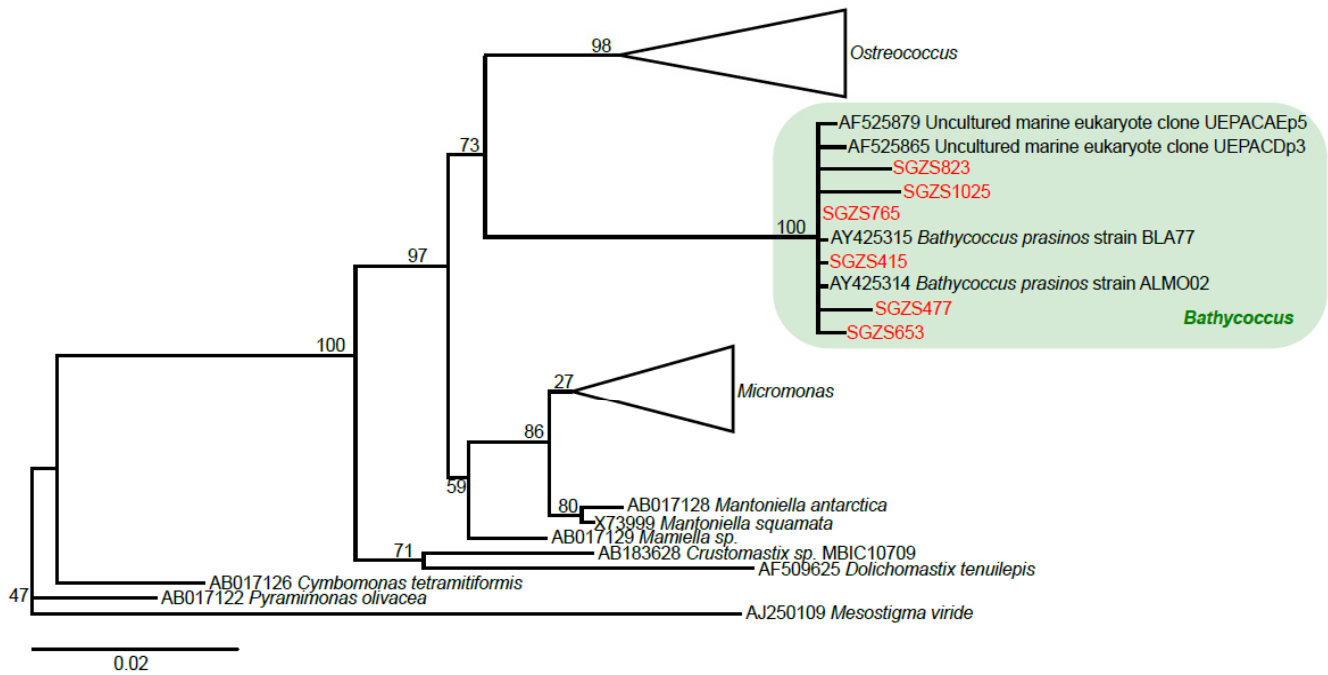

Fig. S2. Analysis of an 18S rDNA clone library from the sorted, MDA amplified population template. All of the 741 successfully sequenced 18S rDNA clones were phylogenetically placed with *Bathyococcus*. Prior to this maximum-likelihood analysis (PhyML) sequences were clustered at 99% identity (sequences were not manually curated) and a single representative of each of the 6 resulting clusters used in the alignment and tree. 830 homologous positions were analyzed after gap removal with 100 boot straps. After discarding gapped positions and ambiguous positions in the alignment, differences between *Bathyococcus* sequences were so few that it resulted in the observed polytomy in this reconstruction.

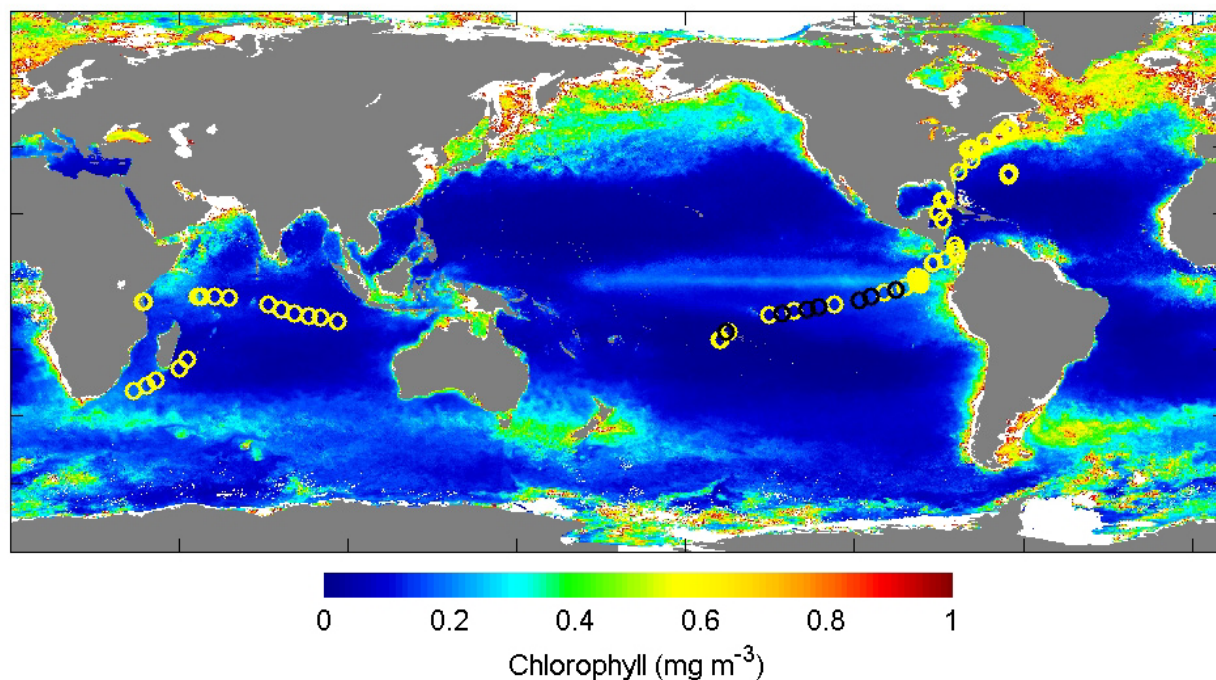

Fig. S3. Aqua MODIS chlorophyll concentration 1 February – 30 September 2005, the period spanning collection of sequenced GOS samples. Grey indicates land, white missing data, yellow circles indicate sites at which PHO4 was detected and black circles indicate those where no PHO4 were detected although the metagenome from the site was analyzed.
